# Supplementary material
Source: PubMed Central journal article supplement (PMC2862546)
Supplement: NIHMS165660-supplement-2.pdf [file NIHMS165660-supplement-2.pdf]

# nature

Corresponding Author Name: Sumit K. Chanda

Address: **10901 N. Torrey Pines Road, La Jolla, CA 92037, USA**

Manuscript Reference Number: 2009-09-12135A-Z

## COLOUR FIGURES IN NATURE

*Nature* is committed to providing authors with the highest quality figures, and we use the latest techniques to achieve this reproduction. We recognise, however, that excessive colour figure and page charges can sometimes place an enormous burden on authors. We therefore charge authors a fee of £735 for the first colour figure and £262.50 per figure for additional colour figures; this covers part, but not all, of our additional costs for four-colour reproduction. (Please note that in EU countries VAT will be added if you are unable to provide us with your VAT details below.)

No author will be denied publication based on his/her inability to meet these charges. If we agree that colour is essential but you are unable to meet the costs, they will be waived if you explain the circumstances to the editor who handled your manuscript before your paper is published. Otherwise you will be billed after publication.

**PLEASE COMPLETE AND SIGN THE SECTION BELOW, DELETING WHICHEVER ALTERNATIVE DOES NOT APPLY, AND RETURN A COPY OF THIS SHEET TO NATURE.**

I agree to pay the sum requested by *Nature* in the event that colour is considered essential.

I am unable to meet the costs of colour for the following reason:

For EU member countries, please tick the box and provide the VAT number if your Institution/University is exempt from VAT:

My Institution/University is a VAT registered paying member of the EU

VAT NUMBER 

|  |  |  |  |  |  |  |  |  |  |  |  |  |  |  |  |  |  |  |  |  |
|--|--|--|--|--|--|--|--|--|--|--|--|--|--|--|--|--|--|--|--|--|
|  |  |  |  |  |  |  |  |  |  |  |  |  |  |  |  |  |  |  |  |  |
|--|--|--|--|--|--|--|--|--|--|--|--|--|--|--|--|--|--|--|--|--|

SIGNED:  \_\_\_\_\_

NAME IN BLOCK LETTERS: Sumit Chanda
